# Supplementary material
Source: PubMed Central journal article supplement (PMC7774285)
Supplement: ao0c05388_si_001.pdf [file ao0c05388_si_001.pdf]

# **UPLC-Q-TOF/MS-based serum metabolomics reveals the anti-ischemic stroke mechanism of nuciferine in MCAO rats**

Lanlan Wu<sup>1,2#</sup>, Chang Chen<sup>1#</sup>, Yongbiao Li<sup>1,2</sup>, Cong Guo<sup>1</sup>, Yuqing Fan<sup>1,2</sup>, Dingrong Yu<sup>1</sup>, Tinglan Zhang<sup>1,2</sup>, Binyu Wen<sup>3\*</sup>, Zhiyong Yan<sup>2\*</sup>, An Liu<sup>1\*</sup>

- 1. Key Laboratory of Beijing for Identification and Safety Evaluation of Chinese Medicine, Institute of Chinese Materia Medica, China Academy of Chinese Medical Sciences, Beijing, 100700, P.R. China;*
- 2. School of Life Science and Engineering, Southwest Jiao Tong University, Chengdu 610031, Sichuan, P.R. China;*
- 3. Dongfang Hospital, Beijing University of Chinese Medicine, Beijing 100078, P.R. China;*

\*Corresponding authors:

## **An Liu**

Key Laboratory of Beijing for Identification and Safety Evaluation of Chinese Medicine, Institute of Chinese Materia Medica, China Academy of Chinese Medical Sciences, No. 16 Nanxiaojie, Dongzhimennei, Beijing, 100700, P.R. China

Tel: +86-10-64093381

Fax: +86-10-64013996

E-mail: [aliu@icmm.ac.cn](mailto:aliu@icmm.ac.cn)

## **Zhiyong Yan**

School of Life Science and Engineering, Southwest Jiao Tong University, No.111, North Section, Second Ring Road, Jinniu District, Chengdu 610031, Sichuan, P.R. China

Tel: +86-28-87601838

Fax: +86-28-87603202

E-mail: [yzyh@swjtu.edu.cn](mailto:yzyh@swjtu.edu.cn)

## **Binyu Wen**

Dongfang Hospital, Beijing University of Chinese Medicine, No.6, District 1, Fangxingyuan, Fangzhuang, Fengtai, Beijing 100078, P. R. China

Tel: +010-67689634

Fax: + 010-67689634

Email: [wen-binyu@163.com](mailto:wen-binyu@163.com)

#These authors contributed equally to this work.

## **Contents**

**Figure S1.** The original unprocessed and high-resolution metabolic correlation

network analysis.

**Table S1.** Metabolites contribute to the information of the metabolic pathways.

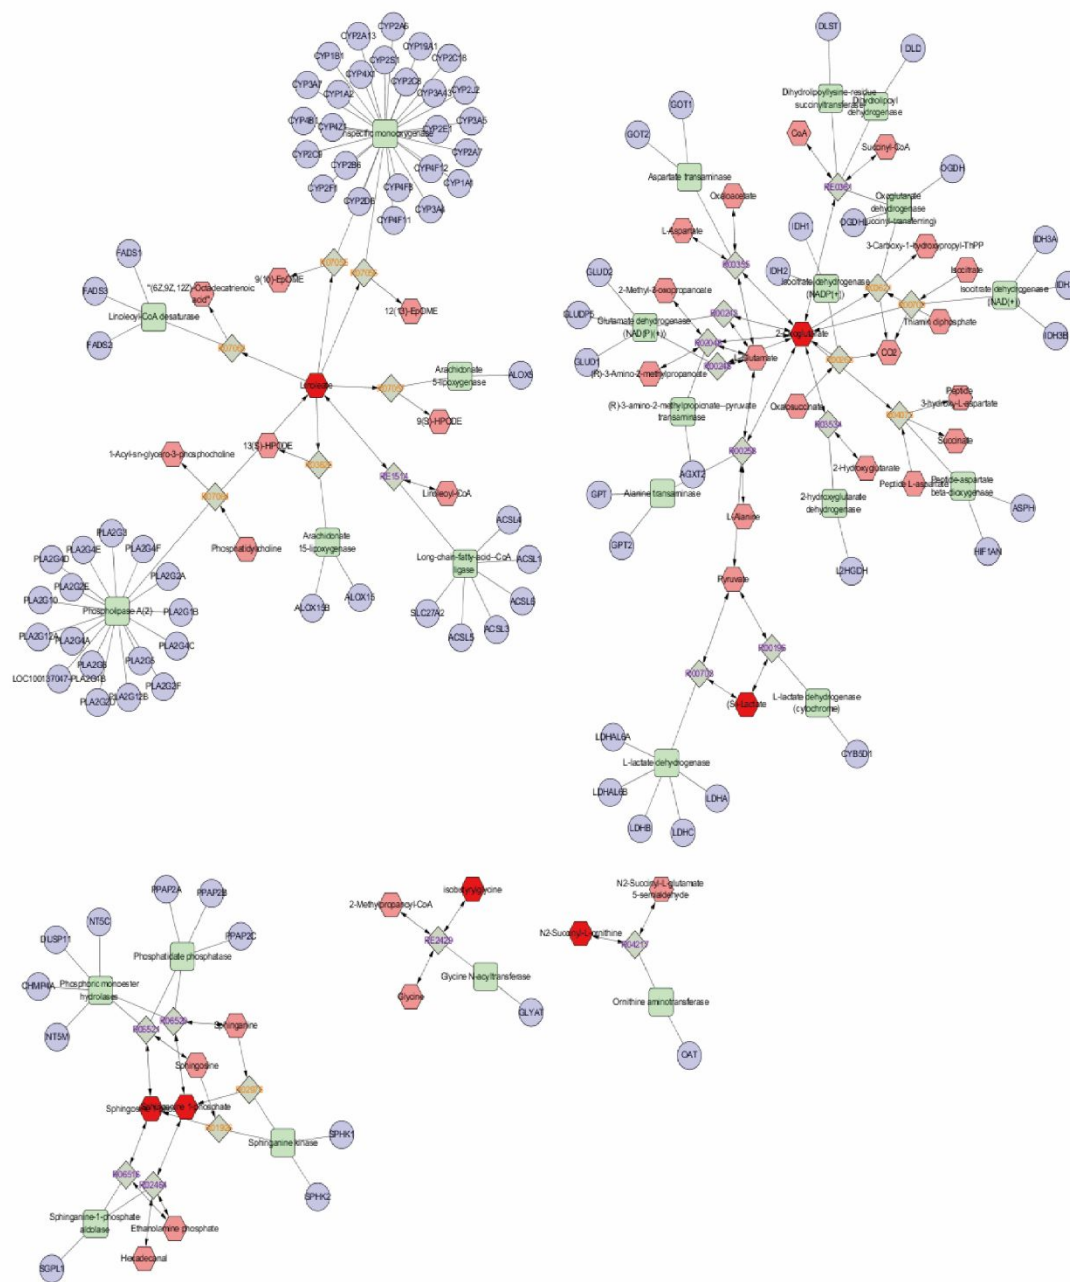

**Figure S1.** The original unprocessed and high-resolution metabolic correlation network analysis.

**Table S1.** Metabolites contribute to the information of the metabolic pathways

| Metabolites               | Related pathway                          |
|---------------------------|------------------------------------------|
| L-lactate                 | Glycolysis and Gluconeogenesis           |
| Sphinganine 1-phosphate   | Glycosphingolipid metabolism             |
| Sphingosine 1-phosphate   | Glycosphingolipid metabolism             |
| Linoleic acid             | Linoleate metabolism                     |
| Oxoglutaric acid          | TCA cycle                                |
| Docosahexaenoic acid      | Di-unsaturated fatty acid beta-oxidation |
| Tauroursodeoxycholic acid | Other metabolisms                        |
